# Supplementary material for: Ultraconserved elements (UCEs) resolve the phylogeny of Australasian smurf-weevils
Source: PLoS One. 2017 Nov 22;12(11):e0188044. doi: 10.1371/journal.pone.0188044 (PMC5699822; doi:10.1371/journal.pone.0188044)
Supplement: S3 Table — Museum abbreviations as follows: SNSB-Zoological State Collection, München (ZSM), State Museum of Natural History Karlsruhe (SMNK), California Academy of Sciences (CAS). (XLS) [file pone.0188044.s003.xls]

## Sheet: Specimen-deposition
specimen	museum deposited	date dispatched	preservation type
Amisallus_cf._whitei_ARC4230	SMNK	2014	etoh
Rhinoscapha_scalaris_ARC4068	SMNK	2007	etoh
E._azureus_Pindiu_ARC1554	SMNK	2009	etoh
E._azureus_Sattelberg_ARC1556	SMNK	2009	etoh
E._bennetti_ARC1557	SMNK	2009	etoh
E._cf._schoenherrii_Dahamo_ARC4055	SMNK	2011	etoh
E._compositus_MVD_26_46	ZSM	1952	museum pinned
E._cuvierii_MVD25	CAS	2002	museum pinned
E._geoffroyi_Cyclops_Mts_ARC1576	SMNK	2007	etoh
E._geoffroyi_MtWilhelm_MVD10	CAS	2014	etoh
E._loriae_MVD49	CAS	2006	museum pinned
E._magnificus_MVD59	CAS	2002	museum pinned
E._messagieri_MVD50	CAS	2000	museum pinned
E._nickerli_MVD60	CAS	1979	museum pinned
E._rigouti_MVD57	ZSM	1974	museum pinned
E._schoenherrii_mimikanus_ARC3949	SMNK	2013	etoh
E._schoenherrii_mimikanus_MVD58	CAS	2002	museum pinned
E._schoenherrii_schoenherrii_ARC1573	SMNK	2007	etoh
G._(Niphetoscapha)_cf._subnacreus_ARC2639	SMNK	2010	etoh
G._(Niphetoscapha)_cf._subnacreus_ARC2645	SMNK	2010	etoh
G._(Niphetoscapha)_inexspectatus_ARC2641	SMNK	2010	etoh
G._(Niphetoscapha)_nitidus_ARC4228	SMNK	2010	etoh
G._(Niphetoscapha)_rostralis_ARC2635	SMNK	2010	etoh
G._(Niphetoscapha)_rostralis_ARC4225	SMNK	2010	etoh
G._botanicus_MVD52	CAS	2014	etoh
G._cf._gressitti_ARC1571	SMNK	2009	etoh
G._cf._integrirostris_MtWilhelm_MVD11	CAS	2014	etoh
G._marquardti_MVD62	CAS	1974	museum pinned
G._vegetatus_ARC1572	SMNK	2009	etoh
G._weiskei_ARC2635	SMNK	2009	etoh
Leptopius_clavis_ARC4060	SMNK	2014	etoh
Mandalotus_sp._ARC4065	SMNK	2014	etoh
Perperus_sp.1_ARC4064	SMNK	2014	etoh
Perperus_sp.2_ARC4233	SMNK	2014	etoh
R._cf._batjanensis_ARC4073	SMNK	2013	etoh
R._cf._doriae_ARC1570	SMNK	2007	etoh
R._cf._fenestrata_ARC1569	SMNK	2007	etoh
R._cf._obsidiana_ARC4054	SMNK	2011	etoh
R._humboldtiana_ARC1578	SMNK	2009	etoh
R._insignis_ARC4069	SMNK	2013	etoh
R._lg_brown_MtWilhelm_MVD51	CAS	2014	etoh
R._sp._Pachyrhynchus_pattern_ARC4070	SMNK	2013	etoh
R._sp._PNG_Highlands_ARC3633	SMNK	2012	etoh
R._thomsoni_ARC1563	SMNK	2009	etoh
R._tricolor_ARC1560	SMNK	2009	etoh
R._tuberculata_ARC1568	SMNK	2009	etoh
R._usta_ARC1567	SMNK	2009	etoh
Stenocorynus_cf._marginatus_ARC4067	SMNK	2014	etoh
